1 **Performance of serological antibody tests for bovine tuberculosis in cattle**  
2 **from infected herds in Northern Ireland**

3 Running title: bTB serological tests performance in Northern Ireland

4 **McCallan, L.<sup>a</sup> Brooks, C.<sup>a</sup>, Couzens, C., Young, F.<sup>a</sup>, Byrne, A.W.<sup>a,b#</sup>, McNair, J.<sup>a</sup>**

5 <sup>a</sup> *Agri-food and Biosciences Institute, Stormont, Belfast, Northern Ireland BT43SD*

6 <sup>a</sup> *School of Biological Sciences, Queen's University Belfast, Belfast, Northern Ireland.*

7 # Corresponding author: [andrew.byrne@afbini.gov.uk](mailto:andrew.byrne@afbini.gov.uk); +44 2890525809

8

9 Wordcount: 3289 (not including Materials and Methods, References, tables, or figure  
10 legends)

## 11 **Abstract**

12 The ability to accurately identify infected hosts is the cornerstone of effective disease control  
13 and eradication programs. In the case of bovine tuberculosis, caused by infection with the  
14 pathogen *Mycobacterium bovis*, accurately identifying infected individual animals has been  
15 challenging as all available tests exhibit less than 100% discriminatory ability. Here we  
16 assess the utility of three serological tests and assess their performance relative to skin test  
17 (Single Intradermal Comparative Cervical Tuberculin; SICCT), gamma-interferon (IFN $\gamma$ ) and  
18 post-mortem results in a Northern Ireland setting. Furthermore, we describe a case-study  
19 where one test was used in conjunction with statutory testing.

20 Serological tests using samples taken prior to SICCT disclosed low proportions of animals as  
21 test positive (mean 3% positive), despite the cohort having high proportions with positive  
22 SICCT test under standard interpretation (121/921; 13%) or IFN $\gamma$  (365/922; 40%) results.  
23 Furthermore, for animals with a post-mortem record (n=286), there was a high proportion  
24 with TB visible lesions (27%) or with laboratory confirmed infection (25%). As a result,  
25 apparent sensitivities within this cohort was very low ( $\leq 15\%$ ), however the tests succeeded in  
26 achieving very high specificities (96-100%). During the case-study, 7/670 (1.04%) samples  
27 from SICCT negative animals from a large chronically infected herd were serology positive,  
28 with a further 10 animals being borderline positive (17/670; 2.54%). 9/17 of these animals  
29 were voluntarily removed, none of which were found to be infected (-lesions/-bacteriology)  
30 post-mortem; 1 serology test negative animal was subsequently lesion+ and *M. bovis*  
31 confirmed at slaughter.

## 32 **Importance**

33 Eradication of bovine tuberculosis (bTB; caused by *Mycobacterium bovis*) has remained  
34 elusive in a number of countries despite long-term coordinated test and cull programs. This

35 can partially be explained by the limitations of available statutory tests; therefore  
36 supplementary test platforms that identify additional infected animals would be of significant  
37 utility. Overall, during our study three serological tests did not disclose a high proportion of  
38 animals as infected in high-risk cattle herds, and exhibited limited ability to disclose animals  
39 that were positive to the statutory skin test, the gamma interferon test (IFN $\gamma$ ), or were post-  
40 mortem confirmed with *M. bovis*. These serological tests could be used in a supplementary  
41 fashion to the statutory tests in particular circumstances; but may be of limited advantage  
42 where parallel use of IFN $\gamma$  and skin testing is performed, as these tests together tended to  
43 disclose the majority of animals with post-mortem evidence of infection in our study cohort.

44 **Keywords:**

45 *Mycobacterium bovis*, IDEXX, Enfer, diagnostic tests, serological tests

46

47        **1. Introduction**

48        Bovine tuberculosis is a globally distributed infectious disease. The impact of infection in  
49        cattle at the national and local level can be profound (1, 2). For example, in Northern  
50        Ireland legislation is in place, supported by the United Kingdom and the European Union,  
51        to control this disease with the eventual aim of total eradication (3). In practical terms,  
52        disease control across Northern Ireland is implemented through the single intradermal  
53        comparative cervical tuberculin (SICCT) test and through carcass inspection at abattoirs  
54        where cattle are slaughtered (3). Animals identified as skin test reactors, either by  
55        standard or severe test interpretation, are removed for slaughter by compulsory order and  
56        examined post-mortem. Furthermore, all animals slaughtered at abattoirs in Northern  
57        Ireland are examined for the presence of tuberculous lesions. Clinical material collected  
58        during meat inspection is cultured for the presence of acid fast bacteria with subsequent  
59        identification of species and strain type (4).

60        Despite the introduction of statutory control measures to identify and remove infected  
61        cattle, bovine TB is a persistent problem in Northern Ireland (5). The epidemiology of  
62        disease is complicated by the presence of infection in wildlife (6, 7), and the potential  
63        confounding effects of concurrent infections (8, 9, 10). Current diagnostic tests applied to  
64        cattle are not sufficiently sensitive to identify all infected animals and to remove them  
65        before infection is spread (11-14). This is despite the introduction and widespread use of  
66        the interferon gamma release assay (IFN $\gamma$ ; 15) to augment the bovine TB testing regime  
67        and to support the front line tests (16). In combination, meat inspection, the skin test and  
68        IFN $\gamma$  tests will identify a significant number of infected cattle, but not all (17). It is  
69        therefore important to investigate and validate tests or improved test strategies that will  
70        broaden the capacity to identify infected animals.

71 The development of serology based assays has been very useful for diagnosis where there  
72 is a Th2 type immune response. Such assays can be high throughput, relatively  
73 inexpensive and blood samples can be submitted to the laboratory a substantial time after  
74 they have been taken from the animal. However, with certain diseases a Th1 type immune  
75 responses predominates and antibody tests are largely inappropriate. This is usually the  
76 case with bovine TB when following infection, the immune response is influenced by T-  
77 cells that direct and maintain a response dominated by IFN $\gamma$  release (18). Should disease  
78 progress and the burden of infection increase then the immune response changes subtly to  
79 a Th2 type where B-cells release antibody (19). In this situation and in the absence of cell  
80 mediated responses that can be exploited using the skin test or the IFN $\gamma$  assay, an  
81 antibody assay may prove useful in the diagnosis of disease. In order to assess the role of  
82 antibody tests within a disease control programme that is already based on cell mediated  
83 responses, we instigated a study that was centred on bovine TB diseased cattle and at-risk  
84 herds. In the study reported here, we compared results from two blind tested antibody  
85 assays with the skin test, post-mortem examination, culture confirmation and the IFN $\gamma$   
86 assay in order to define the utility of serology as a potential diagnostic test. We also  
87 report on a case-study where one of the serological tests was used in a large herd where  
88 there was a recent chronic history of bTB, and where statutory tests were failing to clear  
89 infection.

90

91

## 92       2. Materials and Methods

### 93       2.1 Study cohort

94 Samples intended for analysis were taken from cattle selected from Northern Ireland herds  
95 that were deemed to have a bovine TB problem and were eligible for inclusion in the IFN $\gamma$   
96 testing scheme operated by the Department for Agriculture, Environment and Rural Affairs  
97 (DAERA), Northern Ireland (see 16, 17). Individual blood samples were taken just prior to  
98 the inoculation of tuberculins on day one of the skin test and were submitted to the laboratory  
99 within 8 hours of collection. Whole blood was removed and stimulated with antigens, to be  
100 tested later for IFN $\gamma$  release. Residual whole blood was centrifuged for 15 minutes to separate  
101 plasma from blood cells. Clarified plasma samples were removed individually and stored at -  
102 20°C.

### 103       The skin test and carcass inspection at abattoir

104 All animals included in the study were skin tested under Annex A, Council Directive  
105 64/432/EEC using Prionics tuberculins (PPD<sub>bovis</sub> and PPD<sub>avium</sub>). Each tuberculin (0.1mL) was  
106 injected intradermally at 3000 IU (PPD<sub>bovis</sub>) or 2500 IU (PPD<sub>avium</sub>) on day one of the test.  
107 Skin thickness measurement, pre- and 72 hours post-injection was used to calculate increased  
108 skin thickness and to indicate the diagnostic outcome of the test. Skin test positive cattle were  
109 submitted for slaughter at a designated abattoir in Northern Ireland where carcass inspection  
110 was carried out to reveal the presence or absence of tuberculous lesions. Tissue samples were  
111 taken from tissues with and without tuberculous-like lesions and submitted to the culture  
112 laboratory. Information pertinent to the skin test, and abattoir inspection as well as laboratory  
113 test data was recorded onto the Animal and Public Health Information System (APHIS)  
114 operated by DAERA.

115

## 116 **2.2 Laboratory procedures**

### 117 **Blinded approach to laboratory tests**

118 Sample testing was conducted using a single blind study design in which sample information,  
119 including herd number, ear tag, other laboratory test results, was withheld from technical  
120 staff. This was achieved by assigning arbitrary codes to plasma samples upon collection. The  
121 arbitrary codes and corresponding sample information was stored in a database which was  
122 controlled by a senior technician. In compliance with data protection, information relating to  
123 herds, animals, or samples was withheld.

### 124 **The Interferon gamma (IFN $\gamma$ ) test**

125 Whole blood samples were tested for IFN $\gamma$  release using the Bovigam assay (Prionics,  
126 Switzerland) accredited by the United Kingdom Accreditation Service (UKAS). The  
127 methodology has been described previously (15). Briefly, whole blood samples were received  
128 into the laboratory within eight hours of removal from the animal, stimulated overnight with  
129 Pokeweed mitogen (2ug/ml), phosphate buffered saline, PPD<sub>bovis</sub>, PPD<sub>avium</sub> (both at 2ug/ml)  
130 and ESAT-6 (0.5ug/ml). After overnight culture at 37°C, plasma supernatant fluids were  
131 removed and stored prior to test by ELISA. The ELISA was carried out according the  
132 manufacturer's protocol with regards to reagent dilutions, incubation times and plate wash  
133 regimes. Individual sample results were recorded if reagent control and quality assurance  
134 standards were met. Those samples with a net optical density (OD) index of 0.1 or greater  
135 were positive (net PPD<sub>bovis</sub> – net PPD<sub>avium</sub>) and those less than 0.1 OD units were negative.

### 136 **Selection of serological tests**

137 Tests to be evaluated were based on commercial availability and/or through fulfilling the  
138 tender to test samples via a public tender established by AFBI. Two test providers were  
139 identified (see below) who satisfied the tender requirements.

#### 140 **The IDEXX ELISA for antibodies**

141 IDEXX *M. bovis* ELISA kits were purchased from the manufacturer and the assay was  
142 carried out according to the manufacturer's protocol. The IDEXX ELISA is a commercially  
143 available kit. This ELISA has a 96 well microtitre plate format that detects antibodies to two  
144 *Mycobacterium tuberculosis* complex antigens (MPB70 and MPB83) known to be serological  
145 targets in *Mycobacterium bovis* (*M. bovis*) infections. Briefly, plasma samples were diluted to  
146 1 in 50 in PBS and tested in duplicate. One hundred microliters of reagents were added to  
147 wells in duplicate and incubated for 60 minutes then washed 6 times. Assay positive and  
148 negative test control reagents were used to validate each microtitre plate and provided data to  
149 calculate the test result [sample / positive ratio (S/P ratio)]. Test results were interpreted as  
150 follows: an S/P ratio greater or equal to 0.30 was considered positive and a ratio less than 0.3  
151 was negative.

#### 152 **The Enfer provisioned antibody assay**

153 An Enfer provisioned assay was carried out by Enfer staff at their Naas laboratories (Enfer  
154 ltd, Naas, Co Kildare). All tests were blinded, with no information on the epidemiological  
155 situation (e.g. within herd prevalence) from which animals were selected provided to Enfer. It  
156 should be noted that this Enfer multiplex antibody assay is not a commercially available as a  
157 standalone kit, but testing was provided in fulfilment of commercial services as part of a  
158 commercial tender to AFBI. The basis for this assay methodology have been described  
159 previously (20). For this project, the defined antigens used in this assay were MPB83, ESAT-  
160 6, CFP-10 and MPB70. Two antigen combinations were assessed; these combinations were



161 positive to either MPB70 with MPB83 (Enfer-A), or MPB70, MPB83, ESAT-6 and CFP10  
162 (Enfer-B). Enfer scientific printed the bespoke multiplex according to the tender  
163 requirements, and carried out the screening, utilising bespoke software to read the multiplex  
164 plates (20). It should also be noted that the antibody test set-up did not include protein fusions  
165 and cocktails, which may be used during other Enfer tests (J. Clarke, pers. comm.). Plasma  
166 samples were diluted to 1 in 250 (in Enfer sample buffer A) and added to each well and  
167 incubated and agitated for 30 minutes. After washing, horseradish conjugated anti-bovine  
168 immunoglobulin was added, incubated and washed again. Substrate was added and signals  
169 were captured during a 45 second exposure stored as relative light units. The manufacturer  
170 recommends that a positive result is recorded when a minimum of any two antigens are test  
171 positive.

#### 172 **Laboratory confirmatory tests for Mycobacteria**

173 Clinical samples removed from animals at slaughter were submitted to the containment level  
174 3 laboratory for preparation, decontamination and inoculation onto solid and liquid media.  
175 Culture procedures at the Statutory TB Laboratory at the Agri-food and Biosciences Institute  
176 have been described extensively previously (e.g.17, 21). Tissue structure was disrupted using  
177 either ribolysation or grinding with sterile sand in a pestle and mortar. Prior to inoculation,  
178 clinical samples were decontaminated using 5% oxalic acid for a maximum of 30 min and  
179 washed twice with sterile PBS. Samples were then inoculated onto Lowenstein-Jensen and  
180 Stonebrink slopes, as well as into MGIT culture vessels containing PANTA. At 56 days post  
181 inoculation, cultures were examined for the presence of acid fast mycobacteria and if present  
182 were further analysed using a spoligotype method (22) to identify mycobacterial species and  
183 sub-type. Also, a selection of tissues that were lesion positive were fixed in neutral buffered  
184 formalin solution and prepared for additional histological examination.

185

## 186        **2.3 Analysis**

187        The relationship between the test status and the independent variables was modelled  
188        throughout using binary logit regression models. A random effect for herd id (to account for  
189        potential clustering effects) was included if significant and was tested using a likelihood ratio  
190        test.

191        Throughout we estimated the Area Under the receiver operator Curve (AUC) as an  
192        assessment of the ability of the serological test to discriminate between (apparent) infection  
193        states. The AUC is measured on a continuous scale from 0 to 1; an AUC of 0.5 is no better  
194        than random, with values  $>0.7$  considered an “adequate” diagnostic (23). Apparent  
195        sensitivity, specificity, positive predictive value and negative predictive value was calculated  
196        and reported against non-gold standards of infection status.

197        Each diagnostic was compared against the skin test (SICCT) result, IFN $\gamma$  test result and post-  
198        mortem status of the animal, giving apparent/relative performance indices. We also used the  
199        definition adopted by Whelan et al, (24) to define “true” infection status. In this case,  
200        infection was defined by an animal being positive to the skin test (SICCT standard  
201        interpretation), having a visible lesion at slaughter and having a bacteriological confirmation  
202        result (positive to histology and/or microbiological culture). Being free of infection, negative  
203        animals were negative to SICCT, without lesions at slaughter and without post-mortem  
204        bacteriological confirmation. In addition, we used a combination of IFN $\gamma$ , SICCT, VL and  
205        confirmation, to assess the relative performance of the serology tests.

206        We used binary logit models to assess whether there was any association between animal sex,  
207        age at blood test sample, breed type and the probability of a positive serological test results  
208        being disclosed. Age was modelled both as a raw continuous variable and as a log-  
209        transformed predictor.

210 Throughout, the dataset was organised using Microsoft excel, while all statistical analysis  
211 was undertaken using Stata version 14 (Stata Corp., Texas, USA, 2015).

## 212 **2.4 A problem herd based case study**

213 A case study centred on a relatively large (approximately 1000 cattle over the period) dairy  
214 herd was carried out to assess the utility of antibody detection where animals were known to  
215 be infected and resolution of the problem was proving to be difficult. This particular herd had  
216 a seemingly intractable chronic bovine TB problem which originated between 2002 and  
217 2004. Initially, a relatively small number of bovine TB breakdowns were recorded with  
218 subsequent confirmation of infection caused by *Mycobacterium bovis*. From 2008 onward,  
219 the rate of skin test positive cattle increased significantly with up to 148 skin test positive  
220 animals identified as well as 2 cases of lesions at routine slaughter, i.e. skin test negative  
221 cattle sent for slaughter with confirmed tuberculous lesions disclosed during carcass  
222 inspection. Given the disease history of this herd following routine TB diagnostic  
223 investigations, high risk cohorts of cattle within this herd were blood sampled and tested for  
224 the presence of antibodies to *M. bovis* using IDEXX serology (OIE approved) in 2016. The  
225 fundamental rationale was that detecting antibody in cattle that were skin test negative may  
226 indicate the presence of infection in animals that were considered to be anergic, that is,  
227 unresponsive to cell mediated tests such as the skin test and IFN $\gamma$  assay.

## 228 **Data availability**

229 All data was provided through the APHIS dataset, for which the data controller is DAERA.  
230 All data from which inferences were made are provided within the paper, raw test data has  
231 been deposited in an online repository (25). Additional information on these data is available  
232 from DAERA, Northern Ireland (<https://www.daera-ni.gov.uk/access-information-0>;

233 [daera.informationmanager@daera-ni.gov.uk](mailto:daera.informationmanager@daera-ni.gov.uk)) and would be subject to appropriate Data

234 Protection regulations (UK) in relation to individual farmers/herds.

### 235 3. Results

#### 236 *Agreement and comparison*

237 Overall, there were 922 animals with test result data; all animals had test results for IFN $\gamma$  and  
238 IDEXX, 921 had SICCT, Enfer-A and Enfer-B results, while 286 animals had a post-mortem  
239 result. These animals came from 64 herds with recent bTB breakdowns, with a mean of 14.39  
240 animals sampled per herd (Median: 9.5; Std. Dev.: 13.39; Range: 1-76).

241 There was significant ( $p < 0.001$ ) moderate agreement between the three tests ranging from a  
242 kappa of 0.40 (IDEXX and Enfer-B) to 0.55 (Enfer-A and Enfer-B). Of the animals with  
243 visible lesions found at post-mortem, the proportions deemed positive were not significantly  
244 different between the serological test types (McNemar's test: Enfer-A vs. IDEXX:  $p = 0.65$ ;  
245 Enfer-B vs. IDEXX:  $p = 0.16$ ; Enfer-B vs Enfer-A:  $p = 0.18$ ). Similarly, there were no  
246 difference between test types, when using bacteriological confirmation as the infection status  
247 diagnostic ( $p > 0.25$ ).

#### 248 *Serology test performance in comparison with single or combined diagnostic techniques*

249 The relative performance of the serological tests in comparison with single ante-mortem  
250 diagnostics (Table 1), post-mortem diagnostics (Table 2) and combined tests (Table 3 and  
251 Table 4) are presented below. Relative to single ante-mortem tests (mean test prevalence  
252 27%; Table 1), the serological tests did not disclose a high proportion of test-positive animals  
253 (mean 3% positive). This resulted in the tests exhibiting low apparent sensitivities, averaging  
254 5.73% (range: 4.13% - 9.09%). However, the apparent specificities were always very high,  
255 with a mean of 97.82% (96.40% - 99.50%). While there was a significant positive  
256 relationship between serological test result and statutory ante-mortem outcome, the  
257 discriminatory ability of the tests were always poor (mean AUC: 0.52).

258 Similar results were found when post-mortem diagnostic techniques were used as the  
259 apparent infection status (Table 2). Due to the low sensitivity of the serological antibody  
260 tests, the mean test prevalence was always low (mean test prevalence 4.92%) relative to the  
261 proportion of animals with lesions or post-mortem confirmed infection (mean prevalence  
262 26%).

263 Using similar criteria to Whelan et al. (24) to define animals as “truly” infected and non-  
264 infected, we found that the serological tests exhibited poor sensitivity (9.09% - 13.64%;  
265 Table 3). Utilising IFN $\gamma$  test results as an additional criterion (Table 4), suggested again that  
266 the serological tests exhibited low sensitivities, however the three tests achieved 100%  
267 apparent specificities.

268 Table 5 gives the breakdown of animal ante-mortem test results in relation of each serological  
269 test result. Overall, 8 (8/505; 1.56%), 2 (2/513; 0.39%), and 17 (17/514; 3.31%) animals were  
270 ante-mortem test negative, that were deemed serologically test positive to Enfer-A, Enfer-B  
271 and IDEXX respectively.

272 Table 6 gives a breakdown of animals with post-mortem confirmed *M. bovis* infection, that  
273 were skin-test, IFN $\gamma$ , or either skin-test/ IFN $\gamma$  negative. ENFER-A and IDEXX both disclosed  
274 as positive 3/19 (15.79%) SICCT false-negative animals. The ENFER-B test disclosed two  
275 animals of these 19 animals as positive. However, none of the 14 post-mortem confirmed  
276 animals that were as IFN $\gamma$  negative were found to be serologically positive. Overall, 6 of the  
277 animals with confirmed infection were missed by both SICCT and IFN $\gamma$   
278 tests (6/286; 2.10%), and none of these were disclosed using any of the serological antibody  
279 tests.

280

281 *Sex, age and breed associations with serological test results*

282 There was no evidence of a significant effect of sex on the probability of an animal disclosing  
283 as serological positive across all tests ( $p>0.1$ ). Similarly, there was no evidence of an age  
284 effect on the probability of animals disclosing with serological positive test ( $p>0.08$ ). There  
285 was no relationship between the breed and either Enfer-A ( $p=0.617$ ) or IDEXX ( $p=0.457$ )  
286 positivity. However, there was significant variation in the probability of a positive disclosure  
287 with Enfer-B ( $n= 683$ ;  $p=0.005$ ; Figure 1). This model included five breed types with enough  
288 samples and variation to allow the model to fit ( $n= 26$  to  $378$  per breed type; Figure 1).  
289 Friesian breed cattle exhibited significantly lower odds of disclosing as an Enfer-B test  
290 positive relative to Charolais ( $p=0.025$ ), Hereford ( $p=0.006$ ) and Limousine ( $p=0.012$ )  
291 animals, respectively, however the difference was not significant relative to Aberdeen Angus  
292 cattle ( $p=0.116$ ; see supplementary material for figure of linear predictions with associated  
293 95%CI).

294 **A problem herd based case study**

295 In total, 670 samples from cattle were blood sampled having been selected on the basis of  
296 being high risk cohorts of animal where the infection was most prevalent (ante-mortem  
297 negative in contact animals). Using the manufacturer's recommended S/P ratio cut-off value  
298 of 0.3, seven samples were positive ( $\geq 0.3$ ) and 663 samples were negative ( $\leq 0.3$ ). Five  
299 samples were clearly positive ( $> 0.3$ ), two samples were just above the threshold (0.340 and  
300 0.331) and all the remaining samples were negative. However, 17 samples had S/P ratios just  
301 below the cut-off value, ranging between 0.270 to 0.100 (Table 7).

302 Following release of the serology results and discussions with the herd keeper, nine animals  
303 were voluntarily surrendered for slaughter. At post-mortem examination, all cattle were  
304 designated non-visibly lesioned and clinical samples from the lung associated lymph nodes

305 were submitted for laboratory tests. All samples were culture negative for *M. bovis*.  
306 Subsequent to this serology test based investigation, one animal which was serology negative  
307 and submitted for voluntary slaughter, was examined and found to be visibly lesioned.  
308 Subsequently, clinical samples were culture positive with *M. bovis* confirmed by spoligotype.

309

#### 310 4. Discussion

311

312

313 During the present study, we tested three serological tests (2 versions of the ENFER  
314 multiplex, and the IDEXX AB test) for their relative performance in at-risk herds in Northern  
315 Ireland. Overall, our results suggested that the tests can achieve very high levels of apparent  
316 specificity. However, our results suggested that these tests failed to identify many animals  
317 with pathology or confirmed *M. bovis* infection post-mortem. These results appear at odds  
318 with some previous studies in other populations (24, 26), with serological antibody tests  
319 being suggested as a potential useful diagnostic in certain situations (27-30). However, there  
320 has been reported lower sensitivity estimates elsewhere (e.g. 27, 31).

321 In comparison with previous work by our group (14), serology samples were taken prior to  
322 the SICCT tuberculin test. In work from Spain, when serology tests were evaluated prior to  
323 the tuberculin test, their performance was reduced relative to tests undertaken with samples  
324 after the tuberculin test (27). Samples taken from a cohort of animals prior to skin testing  
325 suggested that the serology tests examined exhibited a sensitivity of 23.9%-32.6% (*M. bovis*  
326 Ab Test (IDEXX) & Enferplex TB assay, respectively; 27). For animals sampled post-skin  
327 test, the beneficial anamnestic effect was most pronounced 15 days post-intradermal testing,  
328 achieving sensitivity estimates of 66.7%-85.2% (27). The effect was apparent by the number  
329 of animals disclosed as serology test positive when tested prior to skin testing (10.7%; 6/56),  
330 72hrs after skin testing (7.1%; 4/56) and 15 days after testing (57.1%; 32/56). In the current



331 study, a small proportion of animals were disclosed as serology positive (mean 3% positive).  
332 However, during another study in Northern Ireland, we found a higher proportion of animals  
333 were disclosed as positive when prevalence was higher (86% SICCT test reactors) and testing  
334 occurred after skin testing (14). The proportion serology positive in that cohort was 39.02-  
335 62.20% positive, with apparent sensitivities relative to post-mortem confirmed infection  
336 estimated to be 68-82%. These results suggest that maximising the beneficial effects of  
337 serology testing may occur if samples are taken after skin testing. Such boosting/priming  
338 effects have been described before in cattle in a number of studies (27, 28, 32-35) and in  
339 other species also (see 36). Two antigens used in the tests assessed during the present study  
340 are known to be boosted by skin testing (MPB83 and MPB70; 35). Such effects have led to  
341 some authorities to require follow-up serology testing during statutory tests, for example with  
342 camelids in Wales (36). However, this effect reduces the utility of such a test in cattle where  
343 proactive eradication programs are in place, as skin test positive animals in Northern Ireland  
344 are routinely culled under legislation (3). Furthermore, in problem herds judicious use of  
345 severe interpretation of the SICCT (this increases sensitivity, at the cost of specificity (13)) is  
346 employed, and also INF $\gamma$  tests (16; and see below), where positive animals are predominately  
347 culled to clear infection.

348 In the present study, a small proportion of infected but SICCT negative animals that were  
349 identified by the serological tests (2-3/19 animals; 10.53%- 15.79%). This suggests that, in  
350 the absence of other ancillary testing, serological tests could be useful to identify part of this  
351 subpopulation (Whelan et al. (24)). Previous research found that of 60 truly infected SICCT  
352 negative or inconclusive animals, 53 (88.3%) were disclosed as positive using a multiplex  
353 ELISA test (24). It is hard to account for the relatively poorer detection rate in our study  
354 relative to Whelan et al. (24), but the discrepancy can partly be explained by the relatively  
355 small number of SICCT negative, *M. bovis* confirmed animals available in the present study.

356 Employing exact confidence intervals around the proportion, suggests significant uncertainty  
357 in our estimate (exact CI: 3.38% - 39.58%). In Northern Ireland, IFN $\gamma$  is routinely used in  
358 herds with problems clearing infection (e.g. see 16, 17). We found in this study, that when  
359 IFN $\gamma$  was used instead of, or in parallel with, SICCT, there were no *M. bovis* confirmed  
360 animals identified by the serological tests employed. This suggests, where both SICCT and  
361 IFN $\gamma$  are used together, there may be limited opportunities to detect additional missed  
362 infected animals using serological tests. Casal et al. (29), however, suggests that in very high  
363 prevalence regions there may be value in parallel interpretation of cellular and antibody  
364 detection techniques to maximise sensitivity.

365 During the case study presented, we found that few animals were disclosed as serologically  
366 positive from a large herd with a substantial chronic bTB problem. Even with liberal  
367 interpretation of one of the serology test (IDEXX) data, few animals were removed, and all  
368 those culled were found to have no visible lesions nor could *M. bovis* be isolated from  
369 samples taken from these animals. One animal that was serologically tested, and found  
370 negative, was subsequently found to have visible lesions and confirmed for *M. bovis* at post-  
371 mortem. This field application of the test in a particular problematic herd appears to  
372 corroborate our findings from the prospective study results. However, other case-studies have  
373 highlighted benefits of serology as ancillary tests in eradicating TB. For example, a red deer  
374 herd in England with a TB outbreak was cleared of infection with the use of both tuberculin  
375 testing and serological testing over a 2 year period (30). The authors suggest that without the  
376 additional removal of serologically test positive, the time to eradication may have been  
377 significantly increased as well as contributing to maintenance and potential transmission to  
378 local wildlife. O'Brien et al. (28) also describes a case-study in a goat herd where skin tests  
379 failed to identify all infected animals, with 6/20 slaughtered animals having visible lesions  
380 and positive to six *M. bovis* antigens.

381 Serological tests could be strategically useful in the case of anergic animals, where advanced  
382 and generalised infection is present leading to failure to respond to SICCT due to an impaired  
383 Cell mediated immunity (CMI) response (12). However, currently there is limited data on the  
384 proportion of animals that could be deemed anergic in Northern Ireland farms. Potentially,  
385 the repeated application of SICCT testing over an animal's lifetime could lead to  
386 desensitisation (12, 37), again resulting in false negatives. When we looked at the impact of  
387 age on the probability of disclosure, we found no significant variation in our cohort.  
388 However, we did find some evidence for variation in disclosure depending on breed-type,  
389 with Friesian cattle exhibiting significantly lower probability of disclosing serology positive  
390 on one of the tests. Further research is required to ascertain whether this is a robust finding –  
391 there is significant uncertainty with the current study given the very small numbers of  
392 animals serologically test-positive. However, previous research has suggested that there may  
393 be significant variation in *M. bovis* susceptibility and pathology across breeds (38, 39), which  
394 could be partially attributed to immunological or genetic variation (40).  
395 One potential reason for the differing outcomes from this study and some other studies using  
396 the Enfer test platform, is that there was a limited set of antigens used across the two test  
397 types (Enfer-a and Enfer-b), namely MPB70, MPB83, ESAT-6 and CFP10. The Enfer  
398 multiplex can detect antibody activity to 25 antigens in a single well in a 96-well plate array  
399 format (20). However, to make cross-comparisons, only the most commonly used antigens  
400 were used during the present study. However, such issues do not arise with the IDEXX-ab  
401 test, as it is a standard commercial kit.

402

## 403 **Conclusions**

404 We have shown that three available serological tests, when applied to cattle populations with  
405 moderate prevalence and with samples taken prior to tuberculin testing, can exhibit limited

406 apparent sensitivities but very high specificities. Serological tests can disclose additional test-  
407 positive animals when used in parallel with the skin tuberculin test. However, we found in  
408 this study, that when IFN $\gamma$  was used instead of, or in parallel with, SICCT, there were no *M.*  
409 *bovis* confirmed animals identified by the serological tests employed. This suggests, where  
410 both SICCT and IFN $\gamma$  are used together, there may be limited opportunities to detect  
411 additional missed infected animals via the serological tests examined when samples were  
412 taken prior to skin testing. From a perspective of a country with an ongoing extensive  
413 eradication scheme, future strategic use of serology may be limited to: 1. extreme cases of  
414 very large breakdowns within herds leading to high within herd bTB prevalence, 2. in  
415 problem herds where IFN $\gamma$  testing is unavailable, and 3. chronically infected herds where  
416 blood samples are taken after tuberculin testing to maximise sensitivity gained from any  
417 anamnestic effects.

418

419

#### 420 **Acknowledgements**

421 This study was funded by the Department of Agriculture, Environment and Rural Affairs  
422 (DAERA) as part of the Evidence and Innovation Strategy under the grant “An assessment of  
423 commercially available serological tests for the detection of cattle infected with bovine  
424 tuberculosis” (grant no.: 15/3/09; Project Leaders: Dr. J. McNair and Dr. A. Byrne).

425        5. **References**

- 426        1. Zinsstag J, Schelling E, Roth F, Kazwala RR. 2006. Economics of bovine tuberculosis. *In*  
427        Thoen CO (Ed.), *Mycobacterium bovis* infection in animals and humans. 2<sup>nd</sup> edition.  
428        Blackwell Publishing, pp. 68-83  
429
- 430        2. O'Reilly LM, Daborn CJ 1995. The epidemiology of *Mycobacterium bovis* infections in  
431        animals and man: a review. *Tuber Lung Dis* 76:1-46.  
432
- 433        3. Abernethy DA, Denny GO, Menzies FD, McGuckian P, Honhold N, Roberts AR. 2006.  
434        The Northern Ireland programme for the control and eradication of *Mycobacterium bovis*.  
435        *Vet Microbiol* 112:231-237.
- 436        4. Skuce RA, McDowell SW, Mallon TR, Luke B, Breadon EL, Lagan PL, McCormick CM,  
437        McBride SH, Pollock JM. 2005. Discrimination of isolates of *Mycobacterium bovis* in  
438        Northern Ireland on the basis of variable numbers of tandem repeats (VNTRs). *Vet Rec*  
439        157:501.
- 440        5. Abernethy DA, Upton P, Higgins IM, McGrath G, Goodchild AV, Rolfe SJ, Broughan  
441        JM, Downs SH, Clifton-Hadley R, Menzies FD, De la Rua-Domenech R. 2013. Bovine  
442        tuberculosis trends in the UK and the Republic of Ireland, 1995–2010. *Vet Rec* 172:312-312.
- 443        6. Palmer MV. 2007. Tuberculosis: a reemerging disease at the interface of domestic animals  
444        and wildlife. *In* *Wildlife and Emerging Zoonotic Diseases: The Biology, Circumstances and*  
445        *Consequences of Cross-Species Transmission* (pp. 195-215). Springer Berlin Heidelberg.  
446
- 447        7. Byrne AW, White PW, McGrath G, O’Keeffe J, Martin SW. 2014. Risk of tuberculosis  
448        cattle herd breakdowns in Ireland: effects of badger culling effort, density and historic large-  
449        scale interventions. *Vet Res* 45:1.
- 450        8. Claridge J, Diggle P, McCann CM, Mulcahy G, Flynn R, McNair J, Strain S, Welsh M,  
451        Baylis M, Williams DJ. 2012. *Fasciola hepatica* is associated with the failure to detect  
452        bovine tuberculosis in dairy cattle. *Nature Comm* 3:853.
- 453        9. Byrne AW, Guelbenzu-Gonzalo M, Strain SAJ, McBride S, Graham J, Lahuerta-Marin A,  
454        Harwood R, Graham DA, McDowell S. 2017. Assessment of concurrent infection with  
455        bovine viral diarrhoea virus (BVDV) and *Mycobacterium bovis*: a herd-level risk factor  
456        analysis from Northern Ireland. *Preventive Vet Medicine*.
- 457        10. Álvarez J, De Juan L, Bezos J, Romero B, Sáez JL, Marqués S, Domínguez C, Mínguez  
458        O, Fernández-Mardomingo B, Mateos A, Domínguez L. 2009. Effect of paratuberculosis on  
459        the diagnosis of bovine tuberculosis in a cattle herd with a mixed infection using interferon-  
460        gamma detection assay. *Vet Microbiol* 135:389-393.
- 461        11. Pollock JM, Welsh MD, McNair J (2005) Immune responses in bovine tuberculosis:  
462        towards new strategies for the diagnosis and control of disease. *Vet Immunol Immunopathol*  
463        108:37–43  
464

- 465 12. de la Rua-Domenech R, Goodchild AT, Vordermeier HM, Hewinson RG, Christiansen  
466 KH, Clifton-Hadley RS. 2006. Ante mortem diagnosis of tuberculosis in cattle: a review of  
467 the tuberculin tests,  $\gamma$ -interferon assay and other ancillary diagnostic techniques. Res Vet Sci  
468 81:190-210.
- 469 13. Lahuerta-Marin A, Milne G, McNair J, Skuce R., McBride S., Menzies F. , McDowell  
470 S.J.W., Byrne A.W., Handel I.G., Bronsvort M.B.C. 2018. Bayesian Latent Class  
471 estimation of sensitivity and specificity parameters of diagnostic tests for bovine tuberculosis  
472 in chronically infected herds in Northern Ireland Bayesian Latent Class estimation of  
473 Sensitivity and Specificity parameters of diagnostic tests for bovine tuberculosis in chronic  
474 herds-Northern Ireland. Vet J in press.
- 475 14. McCallan L, Brooks C, Couzens C, Young F, McNair J, Byrne AW. 2017. Assessment of  
476 serological tests for diagnosis of bovine tuberculosis. Vet Rec 181: 90
- 477 15. Welsh MD, McNair J, McDowell SWJ, Buchanan J, Hill R, McBride SH, Clarke N.  
478 2008. The Northern Ireland Interferon-gamma (IFN-g) Testing Programme. Cattle  
479 Practice 16:136-139
- 480 16. Lahuerta-Marin A, Gallagher M, McBride S, Skuce R, Menzies F, McNair J, McDowell  
481 SW, Byrne AW. 2015. Should they stay, or should they go? Relative future risk of bovine  
482 tuberculosis for interferon-gamma test-positive cattle left on farms. Vet Res 46:1.
- 483 17. Lahuerta-Marin A, McNair J, Skuce R, McBride S, Allen M, Strain SA, Menzies FD,  
484 McDowell SJ, Byrne AW. 2016. Risk factors for failure to detect bovine tuberculosis in cattle  
485 from infected herds across Northern Ireland (2004–2010). Res Vet Sci 107:233-239.
- 486 18. Welsh MD, Cunningham RT, Corbett DM, Girvin RM, McNair J, Skuce RA, Bryson DG,  
487 Pollock JM. 2005. Influence of pathological progression on the balance between cellular and  
488 humoral immune responses in bovine tuberculosis. Immunol 114:101-111.
- 489 19. Pollock JM, Neill SD. 2002. *Mycobacterium bovis* infection and tuberculosis in cattle.  
490 Vet J 163:115-127.
- 491 20. Whelan C, Shuralev E, O'Keeffe G, Hyland P, Kwok HF, Snoddy P, O'Brien A, Connolly  
492 M, Quinn P, Groll M, Watterson T. 2008. Multiplex immunoassay for serological diagnosis  
493 of *Mycobacterium bovis* infection in cattle. Clin Vac Immunol 15:1834-1838.
- 494 21. Stewart LD, McNair J, McCallan L, Gordon A, Grant IR. 2013. Improved detection of  
495 *Mycobacterium bovis* infection in bovine lymph node tissue using immunomagnetic  
496 separation (IMS)-based methods. PloS one 8:e58374.
- 497 22. Kamerbeek J, Schouls LE, Kolk A, Van Agterveld M, Van Soolingen D, Kuijper S,  
498 Bunschoten A, Molhuizen H, Shaw R, Goyal M, Van Embden J. 1997. Simultaneous  
499 detection and strain differentiation of *Mycobacterium tuberculosis* for diagnosis and  
500 epidemiology. J Clin Microbiol 35:907-14.
- 501 23. Hosmer DW, Lemeshow S. 2004. Applied logistic regression. John Wiley & Sons.

- 502 24. Whelan C, Whelan AO, Shuralev E, Kwok HF, Hewinson G, Clarke J, Vordermeier HM.  
503 2010. Performance of the Enferplex TB assay with cattle in Great Britain and assessment of  
504 its suitability as a test to distinguish infected and vaccinated animals. *ClinVaccine Immunol*  
505 17:813-817.
- 506 25. McCallan L, Brooks C, Couzens C, Young F, McNair J, Byrne AW. 2017. Data from  
507 Performance of serological antibody tests for bovine tuberculosis in cattle from infected herds  
508 in Northern Ireland. Figshare. <https://figshare.com/s/db7f5956d1094066180a> DOI:  
509 10.6084/m9.figshare.5705893
- 510 26. Waters WR, Buddle BM, Vordermeier HM, Gormley E, Palmer MV, Thacker TC,  
511 Bannantine JP, Stabel JR, Linscott R, Martel E, Milian F. 2011. Development and evaluation  
512 of an enzyme-linked immunosorbent assay for use in the detection of bovine tuberculosis in  
513 cattle. *ClinVaccine Immunol* 18:1882-1888.
- 514 27. Casal C, Infantes JA, Rivalde MA, Díez-Guerrier A, Domínguez M, Moreno I, Romero B,  
515 de Juan L, Sáez JL, Juste R, Gortázar C. 2017. Antibody detection tests improve the  
516 sensitivity of tuberculosis diagnosis in cattle. *Res Vet Sci* 112:214-21.
- 517 28. O'Brien A, Whelan C, Clarke JB, Hayton A, Watt NJ, Harkiss GD. 2017. Serological  
518 Analysis of Tuberculosis in Goats by Use of the Enferplex Caprine TB Multiplex Test. *Clin*  
519 *Vaccine Immunol* 24:e00518-16.
- 520 30. Busch F, Bannerman F, Liggett S, Griffin F, Clarke J, Lyashchenko KP, Rhodes S. 2017.  
521 Control of bovine tuberculosis in a farmed red deer herd in England. *Vet Rec* 180:68.
- 522 31. Wood PR, Corner LA, Rothel JS, Ripper JL, Fifis T, McCormick BS, Francis B, Melville  
523 L, Small K, De Witte K, Tolson J. 1992. A field evaluation of serological and cellular  
524 diagnostic tests for bovine tuberculosis. *Vet Microbial* 31:71-79.
- 525 32. Waters WR, Palmer MV, Thacker TC, Bannantine JP, Vordermeier HM, Hewinson RG,  
526 Greenwald R, Esfandiari J, McNair J, Pollock JM, Andersen P. 2006. Early antibody  
527 responses to experimental *Mycobacterium bovis* infection of cattle. *Clin Vaccine Immunol*  
528 13:648-54.
- 529 33. Waters WR, Maggioli MF, McGill J, Lyashchenko KP, Palmer MV. 2014. Relevance of  
530 bovine tuberculosis research to the understanding of human disease: Historical perspectives,  
531 approaches and immunologic mechanisms. *Vet Immunol Immunopathol* 159:113-132.
- 532 34. Waters WR, Thacker TC, Nelson JT, DiCarlo DM, Maggioli MF, Greenwald R,  
533 Esfandiari J, Lyashchenko KP, Palmer MV. 2014. Virulence of two strains of *Mycobacterium*  
534 *bovis* in cattle following aerosol infection. *J Com Pathol* 151:410-419.
- 535 35. Waters WR, Palmer MV, Stafne MR, Bass KE, Maggioli MF, Thacker TC, Linscott R,  
536 Lawrence JC, Nelson JT, Esfandiari J, Greenwald R. 2015. Effects of serial skin testing with  
537 purified protein derivative on the level and quality of antibodies to complex and defined  
538 antigens in *Mycobacterium bovis*-infected cattle. *Clin Vaccine Immunol* 6:641-649.

- 539 36. de la Rúa-Domenech R, Rhodes S, Rolfe S, Vordermeier M. 2017. The anamnestic boost  
540 effect of the skin test on antibody responses to *Mycobacterium bovis* in camelids – summary  
541 of evidence.  
542 [http://www.alpacatb.com/anamnestic%20antibody%20response%20\(scientific%20evidence\)](http://www.alpacatb.com/anamnestic%20antibody%20response%20(scientific%20evidence)%20(2).pdf)  
543 [%20\(2\).pdf](http://www.alpacatb.com/anamnestic%20antibody%20response%20(scientific%20evidence)%20(2).pdf)
- 544 37. Monaghan ML, Doherty ML, Collins JD, Kazda JF, Quinn PJ. 1994. The tuberculin test.  
545 Vet Microbiol 40:111-24.
- 546 38. Ameni G, Aseffa A, Engers H, Young D, Gordon S, Hewinson G, Vordermeier M. 2007.  
547 High prevalence and increased severity of pathology of bovine tuberculosis in Holsteins  
548 compared to zebu breeds under field cattle husbandry in central Ethiopia. Clin Vaccine  
549 Immunol 14:1356-1361.
- 550 39. Wright DM, Allen AR, Mallon TR, McDowell SW, Bishop SC, Glass EJ, Bermingham  
551 ML, Woolliams JA, Skuce RA. 2013. Field-isolated genotypes of *Mycobacterium bovis* vary  
552 in virulence and influence case pathology but do not affect outbreak size. PloS one 8:e74503.
- 553 40. Allen AR, Minozzi G, Glass EJ, Skuce RA, McDowell SWJ, Woolliams JA, Bishop SC.  
554 2010. Bovine tuberculosis: the genetic basis of host susceptibility. P R Soc Lond B: Biol Sci  
555 rspb20100830.



556 **Table 1: The relative performance of serological tests against statutory ante-mortem tests. Skin**  
 557 **test = SICCT standard interpretation.**

| Test type   | n          | Comparator   | Odds ratio  | P-value      | AUC         | Sens         | Spec          | PPV           | NPV           | Prev. (comparator) | Test prev.   |
|-------------|------------|--------------|-------------|--------------|-------------|--------------|---------------|---------------|---------------|--------------------|--------------|
| ENFER-A     | 919        | Skin test    | 2.97        | 0.008        | 0.52        | 7.44%        | 97.40%        | 30.00%        | 87.40%        | 13%                | 3.26%        |
| ENFER-A     | 920        | IFN $\gamma$ | 2.73        | 0.009        | 0.52        | 5.22%        | 98.00%        | 63.30%        | 61.20%        | 40%                | 3.26%        |
| ENFER-B     | 919        | Skin test    | 4.26        | 0.012        | 0.52        | 4.13%        | 99.00%        | 38.50%        | 87.20%        | 13%                | 1.41%        |
| ENFER-B     | 920        | IFN $\gamma$ | 5.21        | 0.013        | 0.51        | 2.75%        | 99.50%        | 76.90%        | 61.00%        | 40%                | 1.41%        |
| IDEXX       | 921        | Skin test    | 2.66        | 0.008        | 0.53        | 9.09%        | 96.40%        | 27.50%        | 87.50%        | 13%                | 4.34%        |
| IDEXX       | 922        | IFN $\gamma$ | 1.73        | 0.091        | 0.51        | 5.75%        | 96.60%        | 52.50%        | 61.00%        | 40%                | 4.34%        |
| <b>Mean</b> | <b>920</b> |              | <b>3.26</b> | <b>0.024</b> | <b>0.52</b> | <b>5.73%</b> | <b>97.82%</b> | <b>48.12%</b> | <b>74.22%</b> | <b>27%</b>         | <b>3.00%</b> |

558

559

560 **Table 2: The relative performance of serological tests against statutory post-mortem diagnostic**  
 561 **techniques.**

| Test type   | n          | Comparator     | Odds ratio  | P-value      | AUC         | Sens          | Spec          | PPV           | NPV           | Prev. (comparator) | Test prev.   |
|-------------|------------|----------------|-------------|--------------|-------------|---------------|---------------|---------------|---------------|--------------------|--------------|
| ENFER-A     | 283        | Visible lesion | 5.88        | 0.002        | 0.55        | 12.80%        | 97.60%        | 66.70%        | 74.60%        | 28%                | 5.30%        |
| ENFER-A     | 285        | Confirmed      | 5.03        | 0.003        | 0.55        | 12.70%        | 97.20%        | 60.00%        | 77.00%        | 25%                | 5.26%        |
| ENFER-B     | 283        | Visible lesion | 6.63        | 0.007        | 0.54        | 8.97%         | 98.50%        | 70.00%        | 68.40%        | 28%                | 3.53%        |
| ENFER-B     | 285        | Confirmed      | 7.69        | 0.004        | 0.54        | 9.86%         | 98.60%        | 70.00%        | 76.50%        | 25%                | 3.51%        |
| IDEXX       | 284        | Visible lesion | 5.47        | 0.001        | 0.56        | 14.10%        | 97.10%        | 64.70%        | 74.90%        | 27%                | 5.99%        |
| IDEXX       | 286        | Confirmed      | 4.87        | 0.002        | 0.55        | 14.10%        | 96.70%        | 58.80%        | 77.30%        | 25%                | 5.94%        |
| <b>Mean</b> | <b>284</b> |                | <b>5.93</b> | <b>0.003</b> | <b>0.55</b> | <b>12.09%</b> | <b>97.62%</b> | <b>65.03%</b> | <b>74.78%</b> | <b>26%</b>         | <b>4.92%</b> |

562

563

564 **Table 3: The relative performance of serological tests against a combination of statutory ante-**  
 565 **mortem and post-mortem diagnostic techniques. Positive status animals were positive to SICCT,**  
 566 **had a visible lesion (VL) at slaughter and had bacteriologically confirmed infection; negative**  
 567 **status animals were negative to SICCT, VL and were not confirmed at slaughter.**

| Test type   | n          | Comparator                 | Odds ratio   | P-value      | AUC         | Sens         | Spec          | PPV           | NPV           | Prev. (comparator) | Test prev.   |
|-------------|------------|----------------------------|--------------|--------------|-------------|--------------|---------------|---------------|---------------|--------------------|--------------|
| ENFER-A     | 187        | SICCT + VL<br>+<br>CONFIRM | 14.20        | 0.019        | 0.54        | 9.09%        | 99.30%        | 80.00%        | 78.02%        | 24%                | 2.67%        |
| ENFER-B     | 187        | SICCT + VL<br>+<br>CONFIRM | 10.39        | 0.045        | 0.53        | 6.82%        | 99.30%        | 75.00%        | 77.60%        | 24%                | 2.14%        |
| IDEXX       | 188        | SICCT + VL<br>+<br>CONFIRM | 7.42         | 0.006        | 0.56        | 13.64%       | 97.92%        | 66.67%        | 78.77%        | 31%                | 6.25%        |
| <b>Mean</b> | <b>187</b> |                            | <b>10.67</b> | <b>0.023</b> | <b>0.54</b> | <b>9.85%</b> | <b>98.84%</b> | <b>73.89%</b> | <b>78.13%</b> | <b>26%</b>         | <b>3.69%</b> |

568

569

570 **Table 4: The relative performance of serological tests against a combination of statutory ante-**  
 571 **mortem and post-mortem diagnostic techniques. Positive status animals were positive to SICCT,**  
 572 **Interferon-G, had a visible lesion (VL) at slaughter and had bacteriologically confirmed**  
 573 **infection; negative status animals were negative to SICCT, IFN $\gamma$ , VL and were not confirmed at**  
 574 **slaughter.**

| Test type   | n         | Comparator                          | Odds ratio | P-value | AUC*        | Sens          | Spec           | PPV            | NPV           | Prev. (comparator) | Test prev.   |
|-------------|-----------|-------------------------------------|------------|---------|-------------|---------------|----------------|----------------|---------------|--------------------|--------------|
| ENFER-A     | 68        | SICCT + IFN $\gamma$ + VL + CONFIRM | NA         | NA      | 0.55        | 10.00%        | 100.00%        | 100.00%        | 43.75%        | 59%                | 5.88%        |
| ENFER-B     | 68        | SICCT + IFN $\gamma$ + VL + CONFIRM | NA         | NA      | 0.54        | 7.50%         | 100.00%        | 100.00%        | 43.08%        | 59%                | 4.41%        |
| IDEXX       | 68        | SICCT + IFN $\gamma$ + VL + CONFIRM | NA         | NA      | 0.58        | 15.00%        | 100.00%        | 100.00%        | 45.16%        | 59%                | 8.82%        |
| <b>Mean</b> | <b>68</b> |                                     |            |         | <b>0.55</b> | <b>10.83%</b> | <b>100.00%</b> | <b>100.00%</b> | <b>44.00%</b> | <b>59%</b>         | <b>6.37%</b> |

575

576

577 **Table 5: Tabulation of the relationship between serological test result, gamma interferon (IFN $\gamma$ )**  
 578 **status and skin test status. Numbers italicised represent ante-mortem negative animals that**  
 579 **were serologically test positive.**

|               |                 | <b>IFN<math>\gamma</math>-</b> | <b>IFN<math>\gamma</math>+</b> |                 | <b>IFN<math>\gamma</math>-</b> | <b>IFN<math>\gamma</math>+</b> |               | <b>IFN<math>\gamma</math>-</b> | <b>IFN<math>\gamma</math>+</b> |
|---------------|-----------------|--------------------------------|--------------------------------|-----------------|--------------------------------|--------------------------------|---------------|--------------------------------|--------------------------------|
| <b>SICCT-</b> | <b>Enfer-A-</b> | 505                            | 272                            | <b>Enfer-B-</b> | 511                            | 279                            | <b>IDEXX-</b> | 497                            | 274                            |
|               | <b>Enfer-A+</b> | 8                              | 13                             | <b>Enfer-B+</b> | 2                              | 6                              | <b>IDEXX+</b> | 17                             | 12                             |
| <b>SICCT+</b> | <b>Enfer-A-</b> | 39                             | 73                             | <b>Enfer-B-</b> | 41                             | 75                             | <b>IDEXX-</b> | 40                             | 70                             |
|               | <b>Enfer-A+</b> | 3                              | 6                              | <b>Enfer-B+</b> | 1                              | 4                              | <b>IDEXX+</b> | 2                              | 9                              |

580

581 **Table 6: Proportion of confirmed infected animals with positive serological test results, which were**  
582 **missed by SICCT, IFN $\gamma$ , or both ante mortem bovine TB tests.**

| <b>Confirmed infection</b>               | <b>ENFER-<br/>A</b> | <b>ENFER-<br/>B</b> | <b>IDEXX</b> |
|------------------------------------------|---------------------|---------------------|--------------|
| <b>SICCT- (n)</b>                        | 3/19                | 2/19                | 3/19         |
| <b>(% serology positive)</b>             | 15.79%              | 10.53%              | 15.79%       |
| <b>IFN<math>\gamma</math> -</b>          | 0/14                | 0/14                | 0/14         |
| <b>(% serology positive)</b>             | 0%                  | 0%                  | 0%           |
| <b>SICCT or IFN<math>\gamma</math> -</b> | 0/6                 | 0/6                 | 0/6          |
| <b>(% serology positive)</b>             | 0%                  | 0%                  | 0%           |

583

584

585 **Table 7. Distribution of S/P ratios for 670 samples tested for antibodies using the IDEXX**  
586 **ELISA for *M. bovis* in one chronically infected case-study farm in Northern Ireland.**

| S/P $\geq$ 0.3 | S/P < 0.3 to 0.1 | < 0.1 to 0.0 | < 0.0 to -0.094 |
|----------------|------------------|--------------|-----------------|
| Positive       | Negative         | Negative     | Negative        |
| 7              | 17               | 55           | 591             |

587

588

589

590

591

592 **Figure 1:** The predicted probability of an animal testing positive to the Enfer-B serological test  
593 depending on breed type. The size of the circles represents the weighted sample size for each breed  
594 type modelled; numbers represent the number of observations for each breed type.

595

596



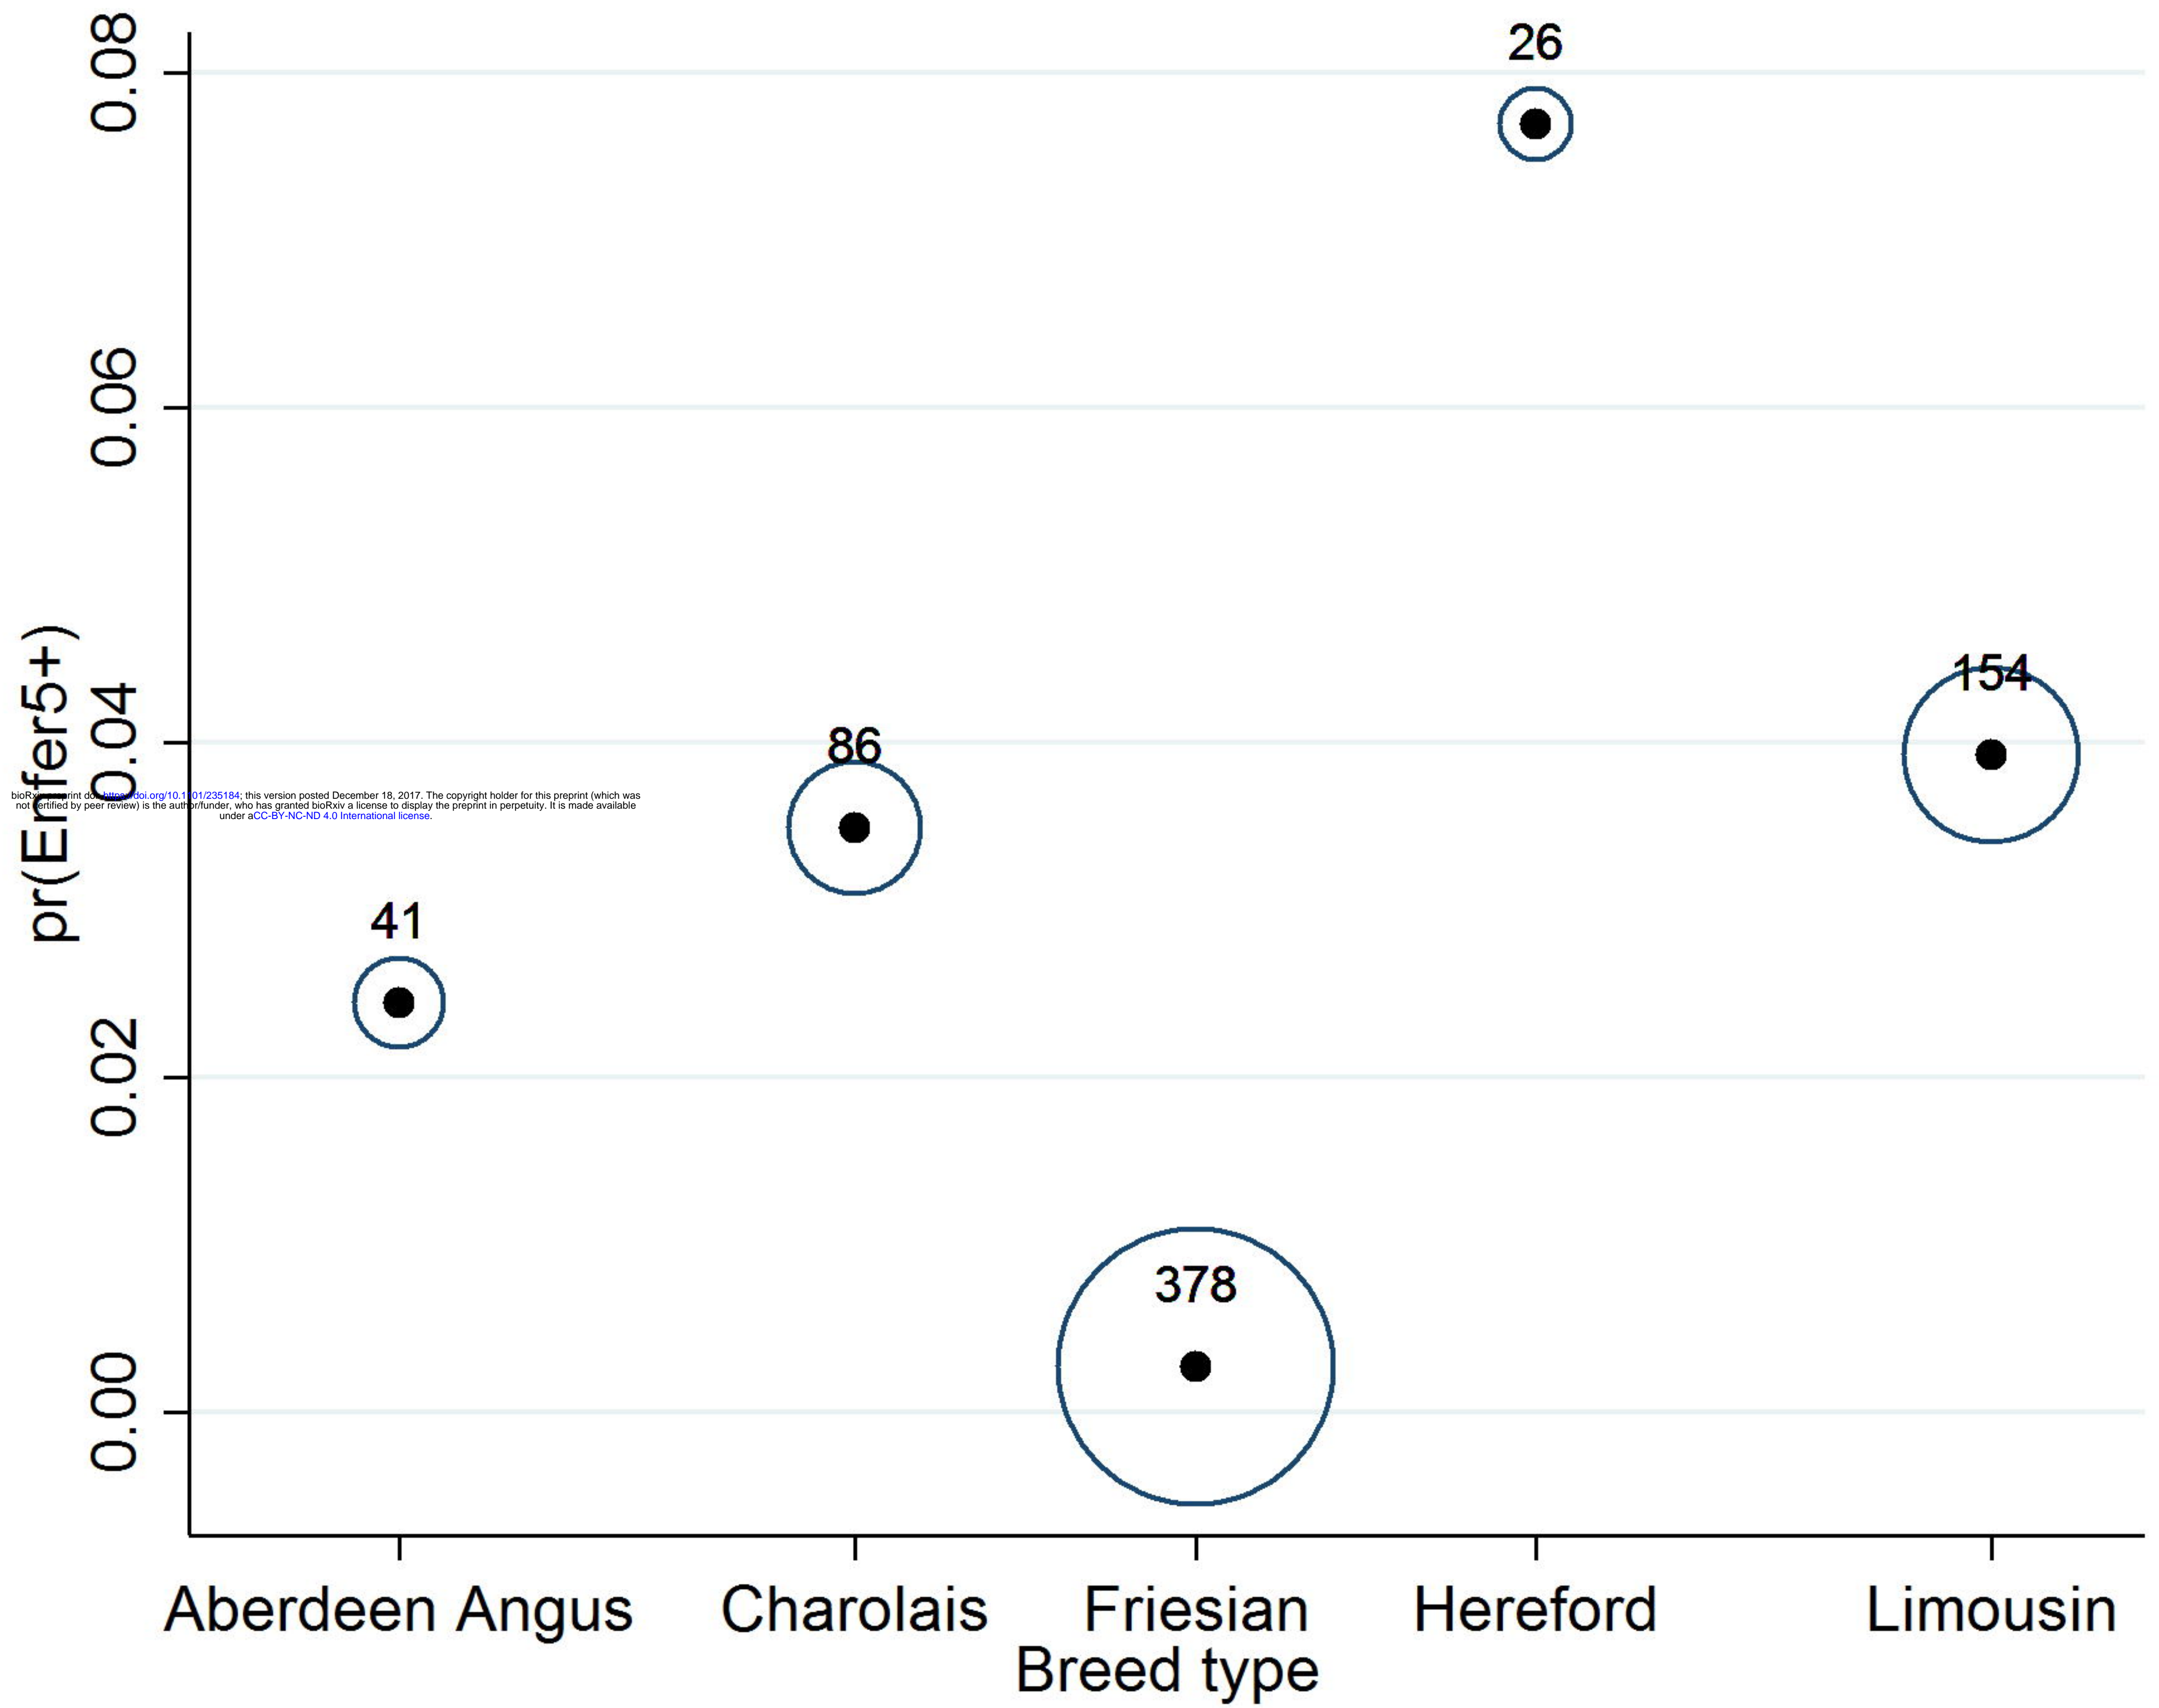

bioRxiv preprint doi: <https://doi.org/10.1101/235184>; this version posted December 18, 2017. The copyright holder for this preprint (which was not certified by peer review) is the author/funder, who has granted bioRxiv a license to display the preprint in perpetuity. It is made available under aCC-BY-NC-ND 4.0 International license.
